# Supplementary material
Source: ML conference proceedings conference paper supplement (https://openreview.net/forum?id=Zihqr7qqpg)

Test accuracy

—+— Training accuracy    — Training loss    — Validation accuracy    — Validation loss

CIFAR-10

CIFAR-100

ImageNet-16-120

Fashion-MNIST

jasmine

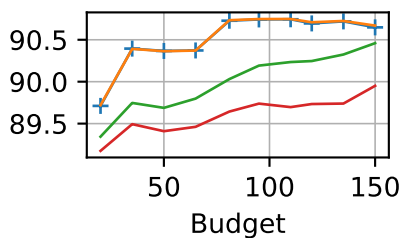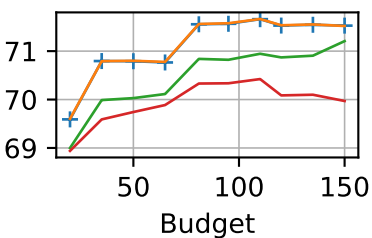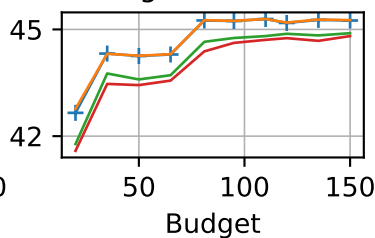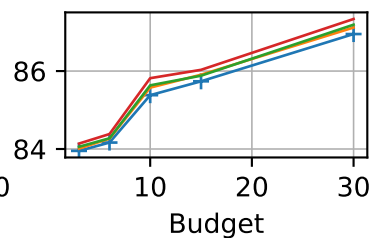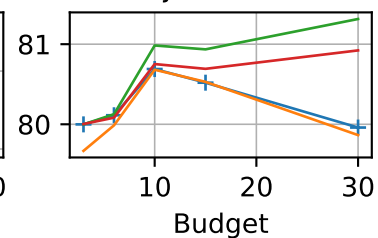

Min regret

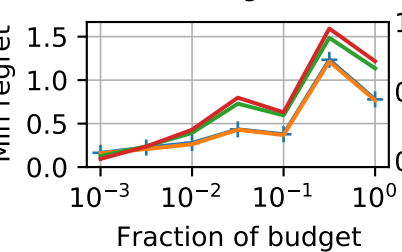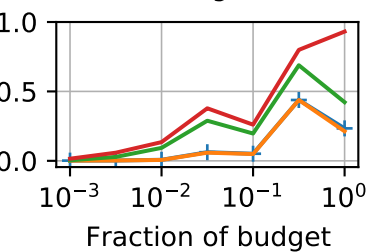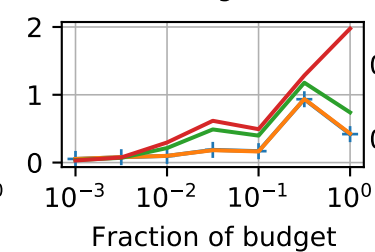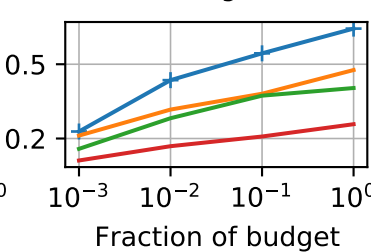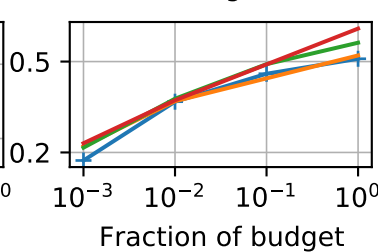

Supplement: supplementary_material [file attachment]
