# Supplementary material
Source: ML conference proceedings conference paper supplement (https://openreview.net/forum?id=Zihqr7qqpg)

Train. acc.      Train. loss      Valid. acc.      Valid. loss  
Train. avg. acc.      Train. avg. loss      Valid. avg. acc.      Valid. avg. loss

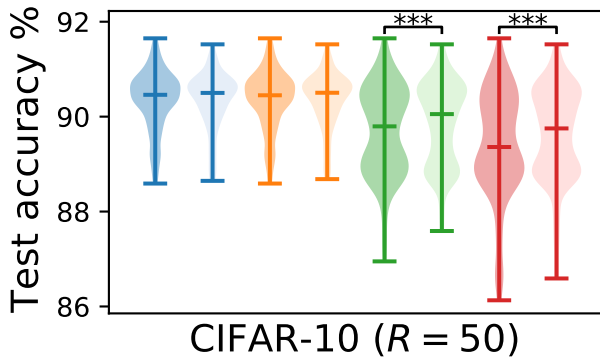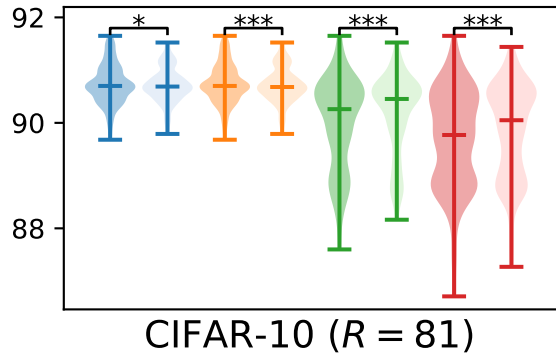

Supplement: supplementary_material [file attachment]
