# Supplementary material
Source: ML conference proceedings conference paper supplement (https://openreview.net/forum?id=Zihqr7qqpg)

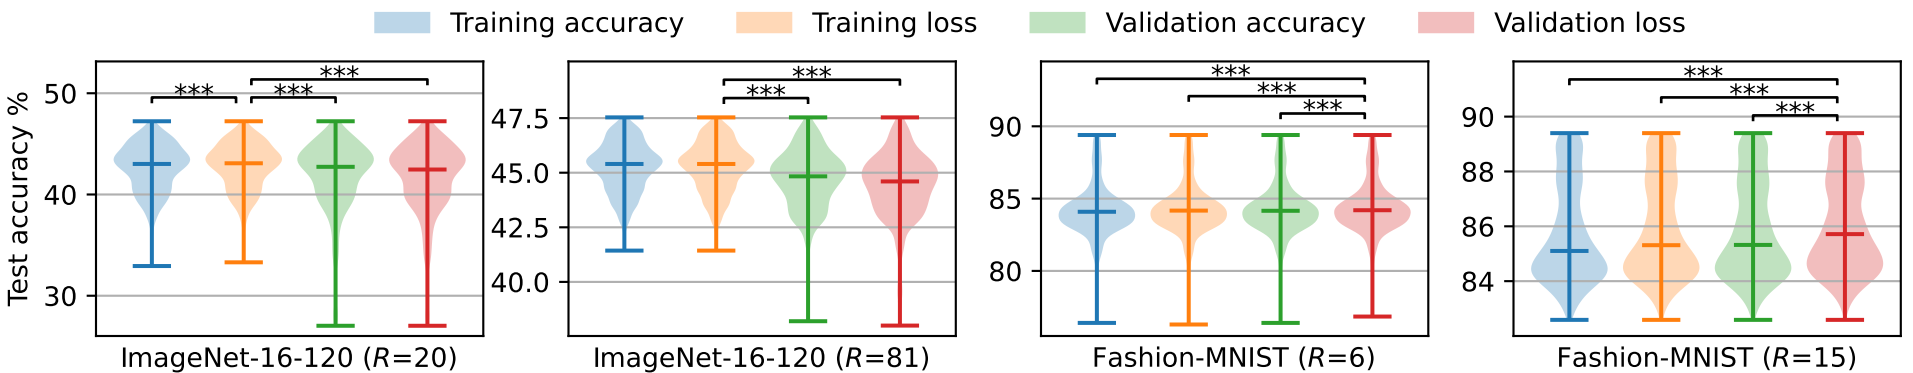

Supplement: supplementary_material [file attachment]

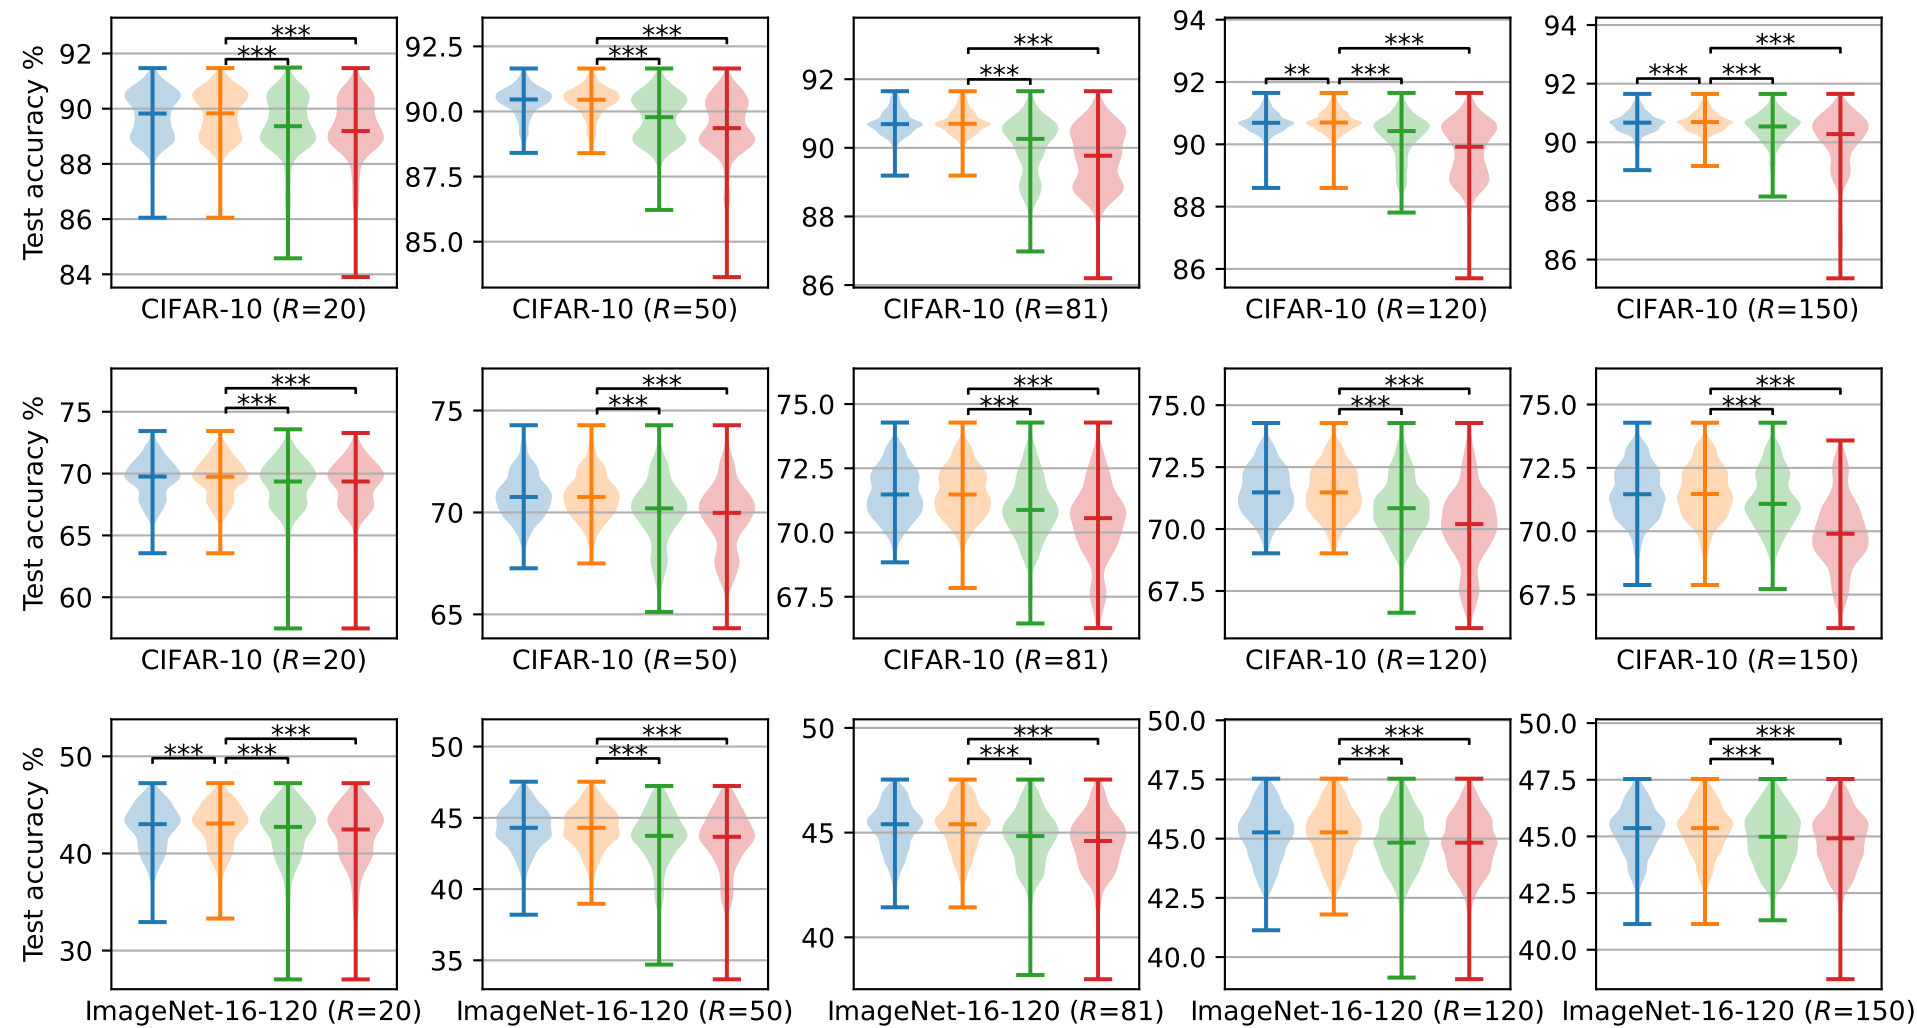

Supplement: supplementary_material [file attachment]

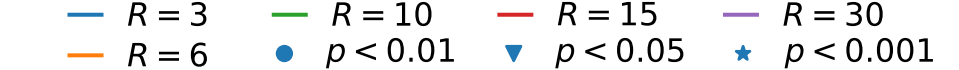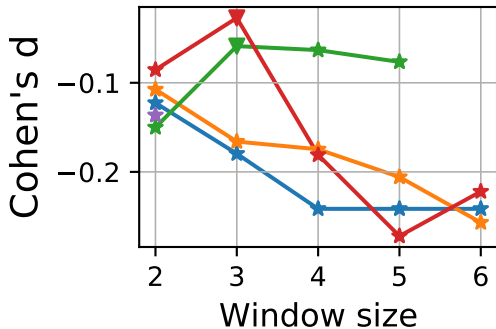

(a) Over validation loss

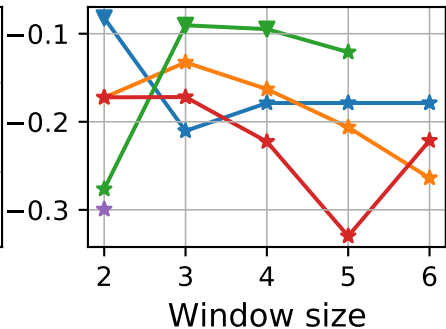

(b) Over training loss

Supplement: supplementary_material [file attachment]

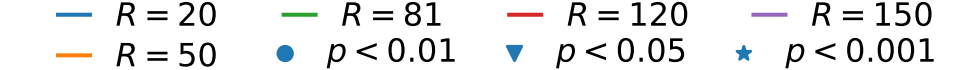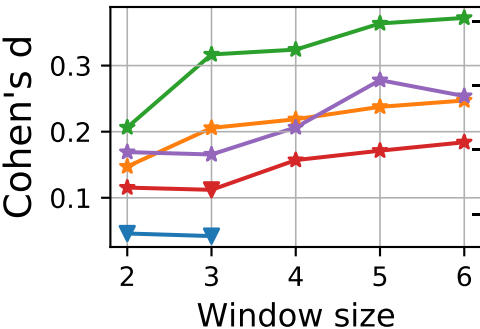

(a) Over validation loss

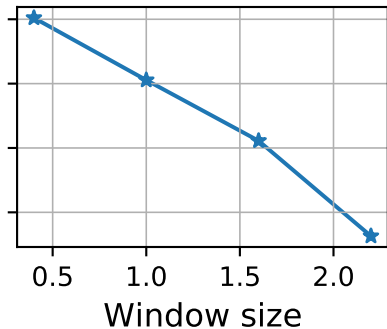

(b) Over training loss

Supplement: supplementary_material [file attachment]

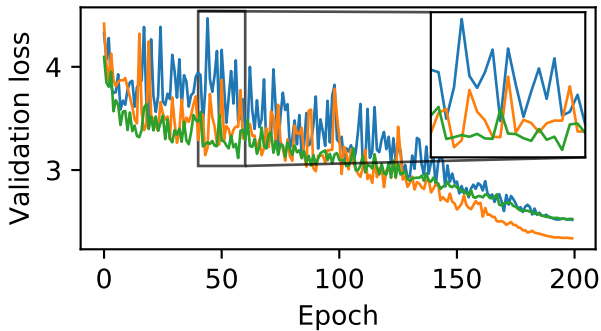

(a) Validation loss curve

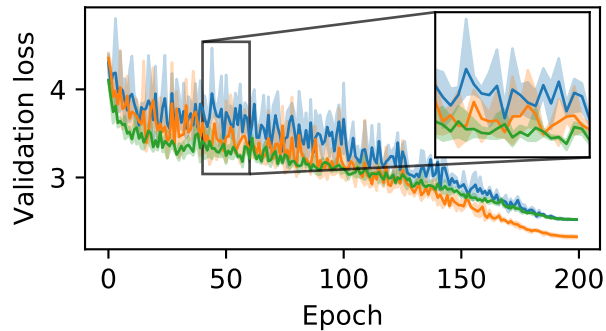

(b) Losses across random seeds

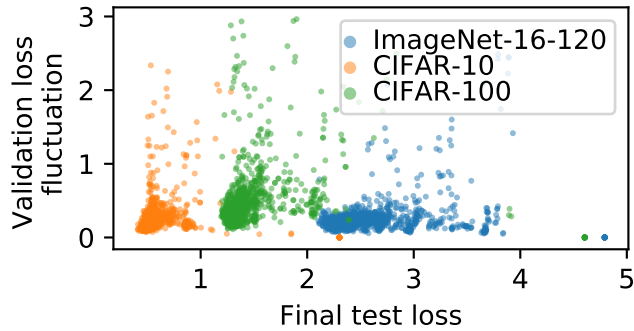

(c) Early-stage fluctuation v.s. Capacity

Supplement: supplementary_material [file attachment]

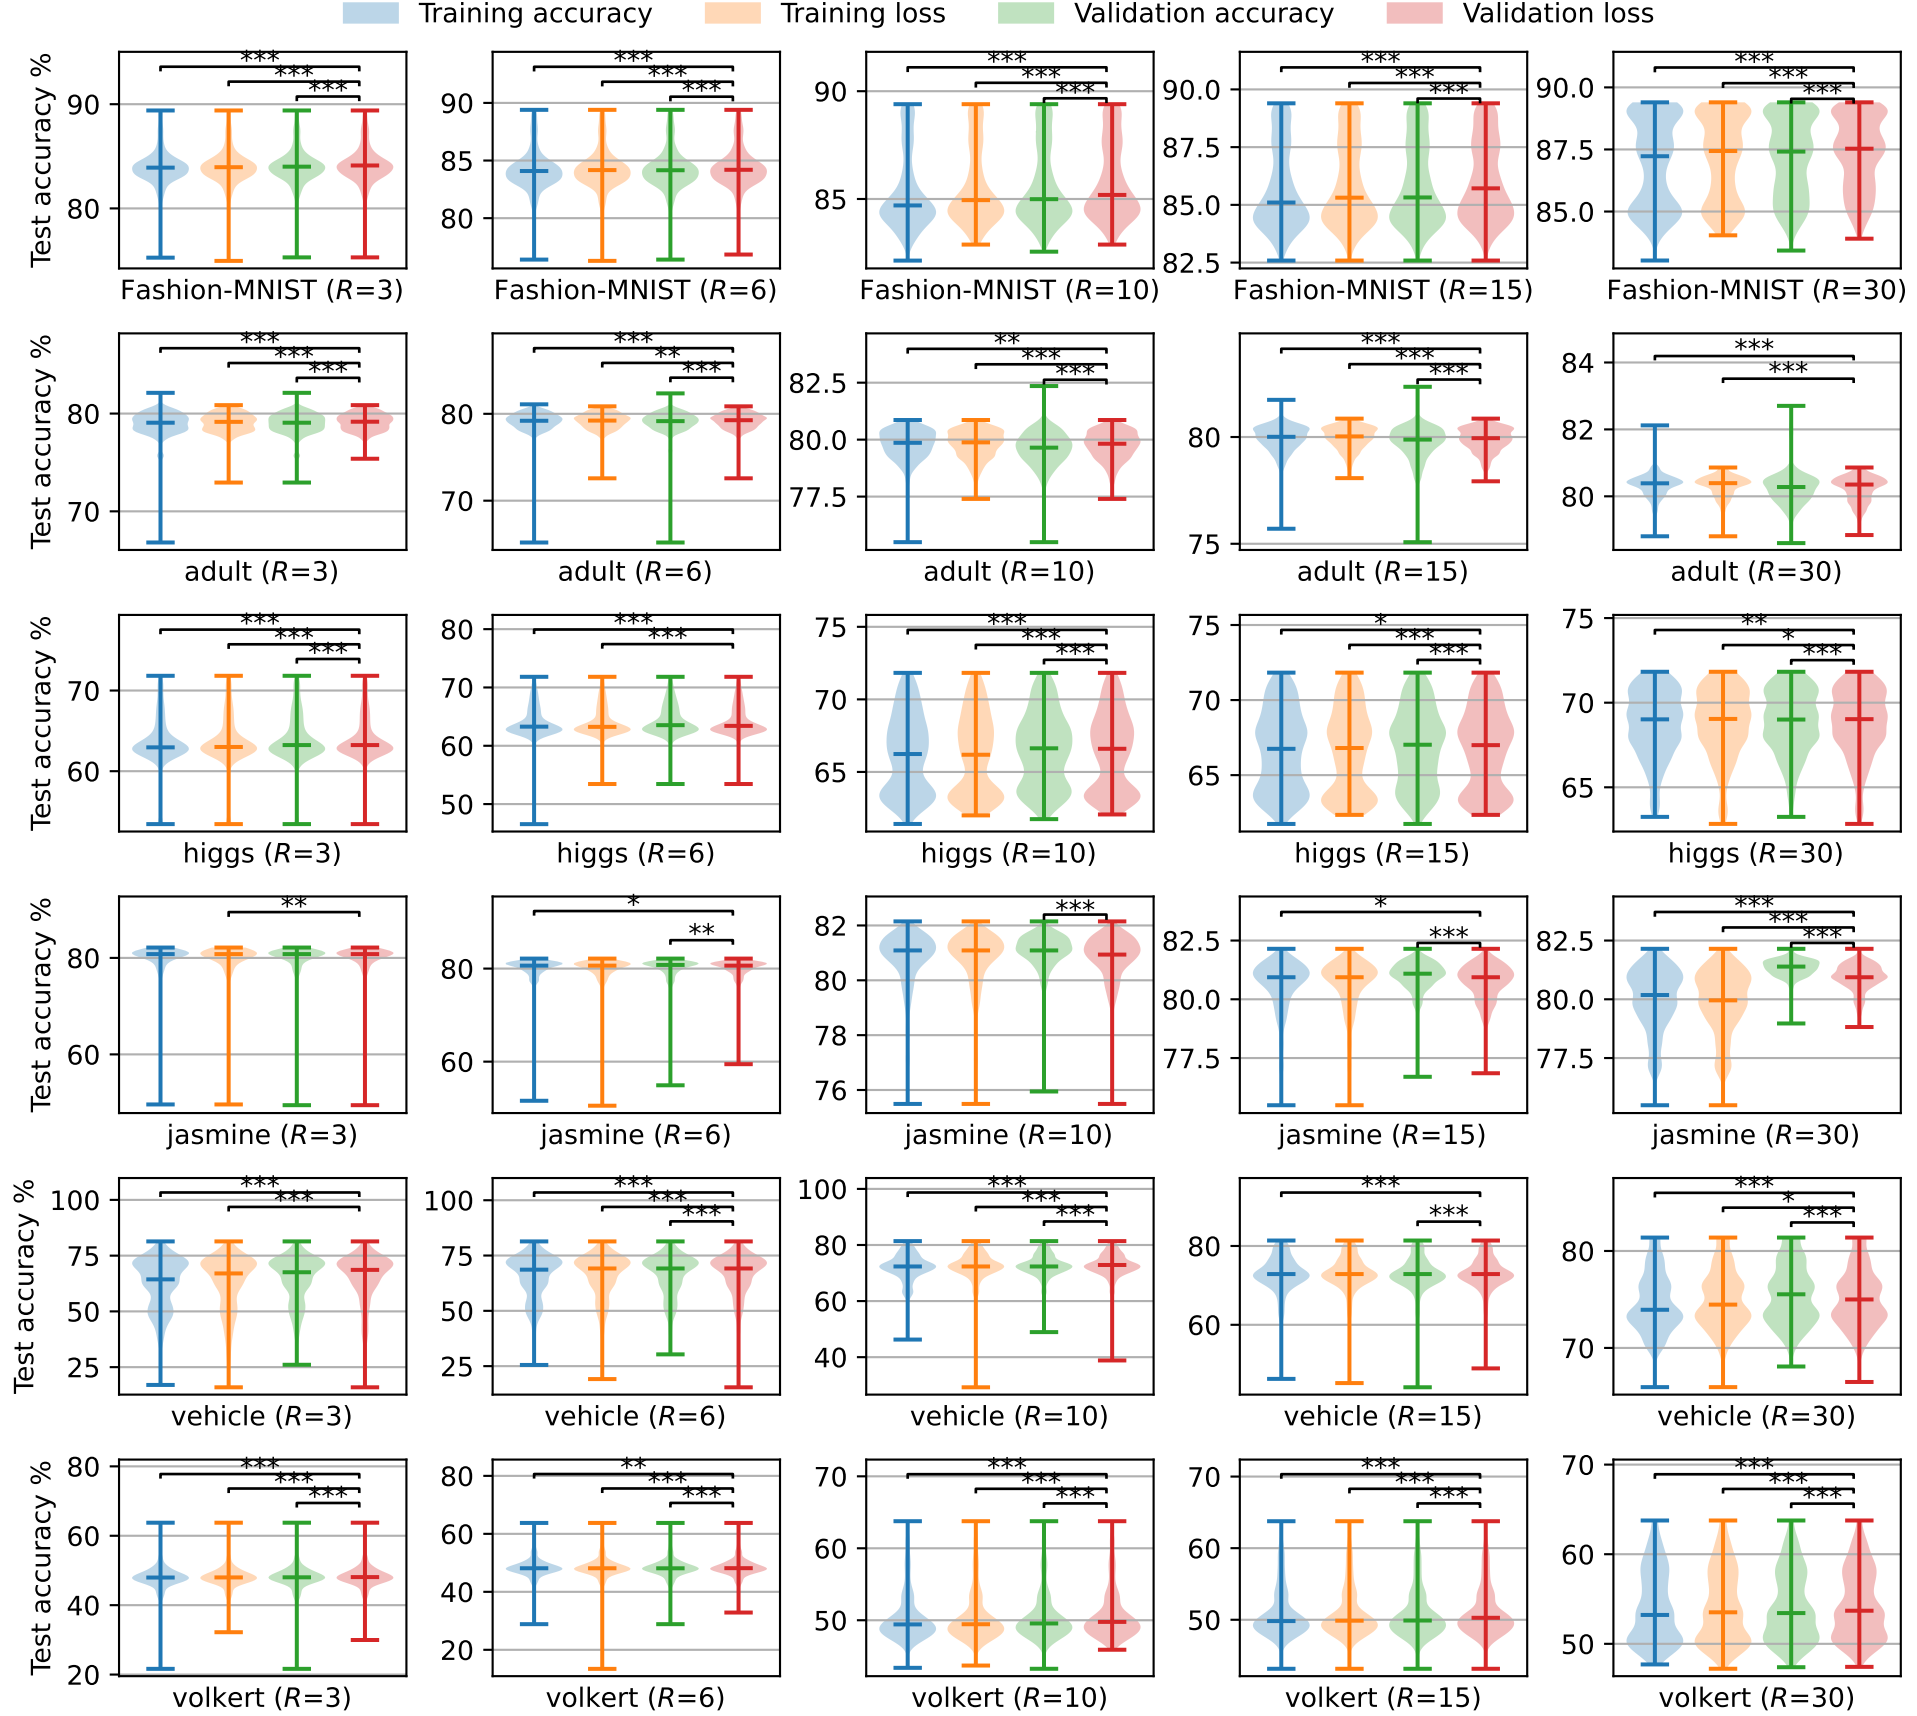

Supplement: supplementary_material [file attachment]

ImageNet-16-120

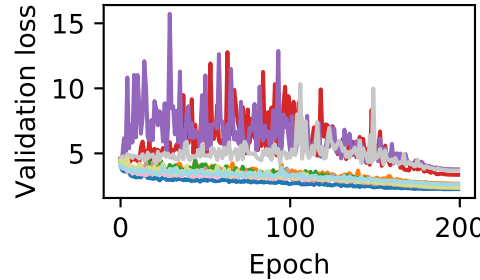

ImageNet-16-120

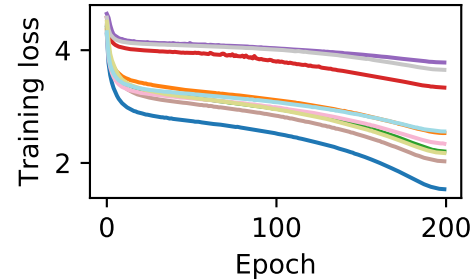

Fashion-MNIST

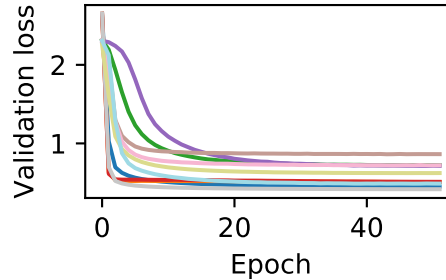

Fashion-MNIST

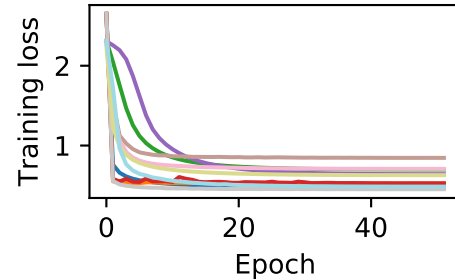

Supplement: supplementary_material [file attachment]
